# Supplementary material for: Preparation and tribological properties of graphene oxide/nano-MoS2 hybrid as multidimensional assembly used in the polyimide nanocomposites
Source: Royal Society of Chemistry journal article supplement (doi:10.1039/c6ra27108a), 2017-01-01
Supplement: c6ra27108a1.pdf [file c6ra27108a1.pdf]

## **Electronic supplementary information**

# Preparation and tribological properties of graphene oxide/nano-MoS<sub>2</sub> hybrid as multidimensional assembly used in polyimide nanocomposites

*Yuanshi Xin, Tongsheng Li, \* Dafei Gong, Fanglin Xu and Mingming Wang*

State Key Laboratory of Molecular Engineering of Polymers, Department of  
Macromolecular Science, Fudan University, Shanghai, 200433, P. R. China.

\*Corresponding author. Tel: +86-21-51630401. E-mail: [lits@fudan.edu.cn](mailto:lits@fudan.edu.cn).

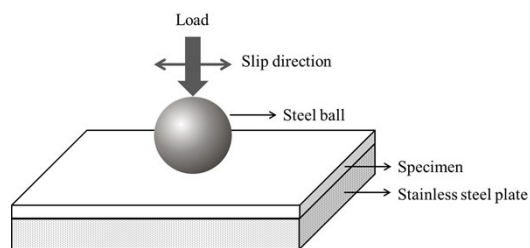

**Fig. S1** Schematic diagram of the contact configuration of the reciprocating friction and wear testing machine.

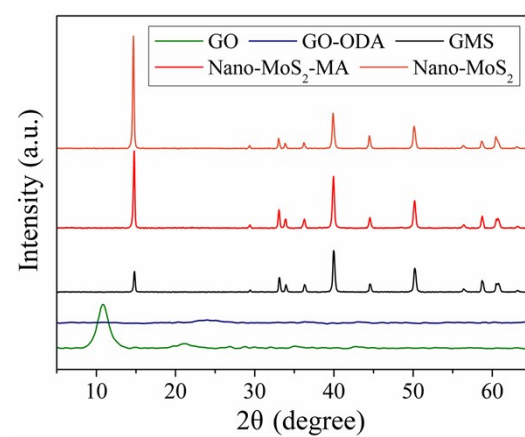

**Fig. S2** XRD patterns of nano-MoS<sub>2</sub>, nano-MoS<sub>2</sub>-MA, GO, GO-ODA and GMS.

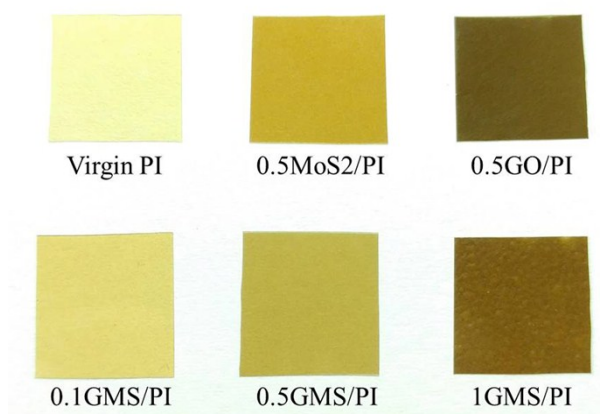

**Fig. S3** Digital photographs of virgin PI, 0.5GO/PI, 0.5MoS<sub>2</sub>/PI, 0.1GMS/PI, 0.5GMS/PI and 1GMS/PI specimens.

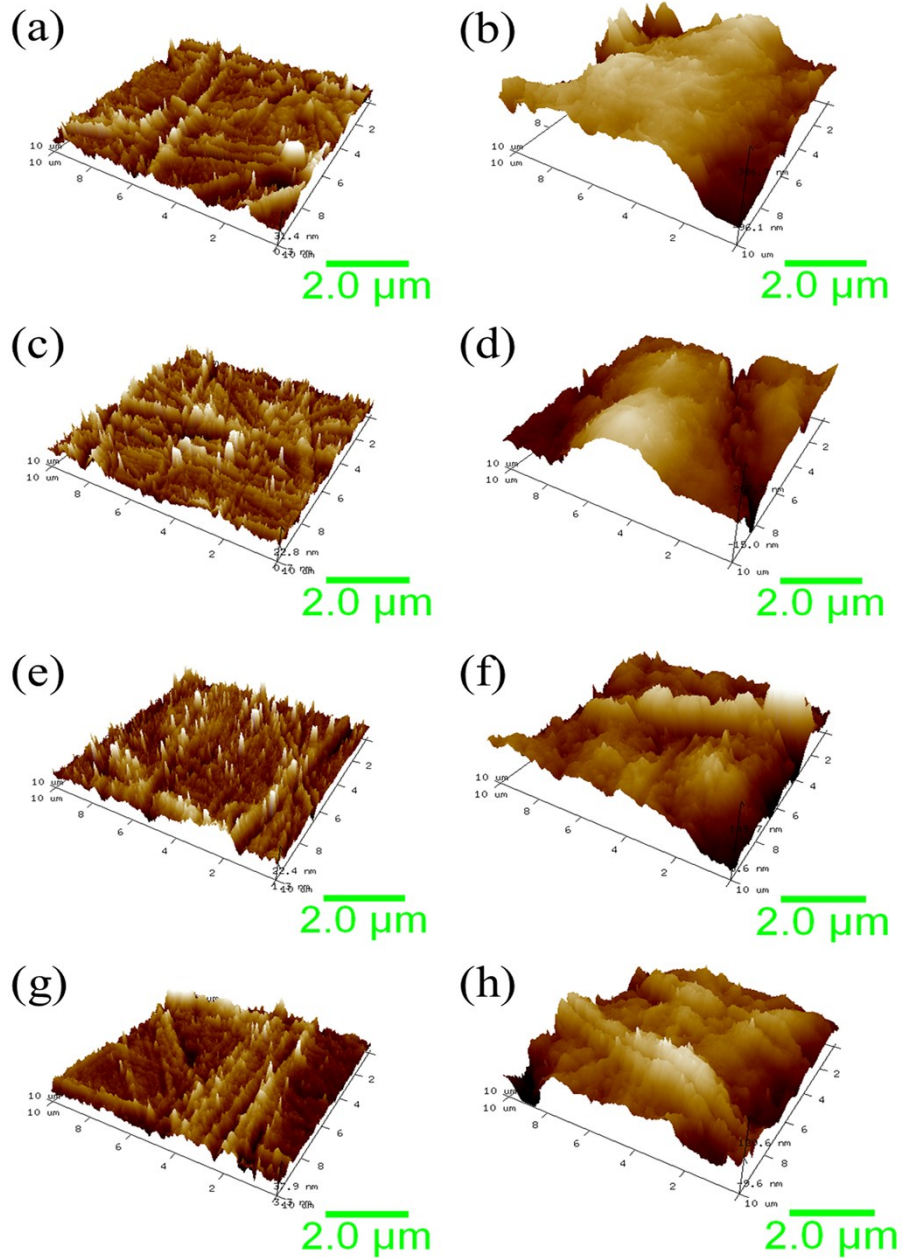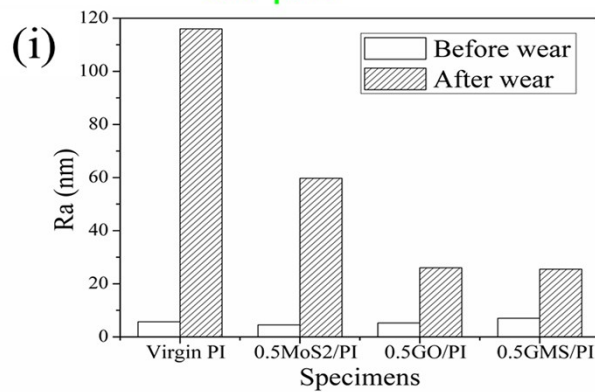

**Fig. S4** 3D surface appearances of (a) virgin PI, (c) 0.5MoS2/PI, (e) 0.5GO/PI, (g) 0.5GMS/PI specimens before wear and (b) virgin PI, (d) 0.5MoS2/PI, (f) 0.5GO/PI, (h) 0.5GMS/PI specimens after wear. (i) Degree of roughness of specimens.
